# Supplementary material
Source: HighWire-hosted journal article supplement (https://erj.ersjournals.com/highwire/filestream/113173/field_highwire_adjunct_files/0/ERJ_NTM_rx_cost_Online_Supplement_Table.pdf)
Supplement: ERJ_NTM_rx_cost_Online_Supplement_Table.pdf [file ERJ_NTM_rx_cost_Online_Supplement_Table.pdf]

**Online Supplementary Table: Costs of individual components of treatment for pulmonary NTM disease**

| Intervention                              | Costs                |                                  |
|-------------------------------------------|----------------------|----------------------------------|
|                                           |                      |                                  |
| <b>Drugs (daily cost)*</b>                |                      |                                  |
| Azithromycin 250 mg                       | 2.77                 |                                  |
| Clarithromycin 1000 mg                    | 4.94                 |                                  |
| Ethambutol 800 mg                         | 0.62                 |                                  |
| Rifampin 600 mg                           | 2.48                 |                                  |
| Ciprofloxacin 1000 mg                     | 2.82                 |                                  |
| Levofloxacin 500 mg                       | 4.28                 |                                  |
| Moxifloxacin 400 mg                       | 6.21                 |                                  |
| Amikacin 500 mg                           | 33.32                |                                  |
| Doxycycline 200 mg                        | 1.43                 |                                  |
| Isoniazid 300mg                           | 0.08                 |                                  |
| Linezolid 600 mg                          | 77.77                |                                  |
| Pyrazinamide 100 mg                       | 2.26                 |                                  |
|                                           |                      |                                  |
| <b>Drug administration and monitoring</b> |                      |                                  |
| Homecare nursing visit                    | 47.83                |                                  |
| CBC, liver enzymes (monthly)              | 12.00                |                                  |
| Audiogram                                 | 71.00                |                                  |
|                                           |                      |                                  |
| <b>Physician's fees</b>                   |                      |                                  |
| Initial consultation                      | 132.50               |                                  |
| Follow-up†                                | 50.50-82.90          |                                  |
|                                           |                      |                                  |
| <b>Imaging</b>                            | <b>Physician fee</b> | <b>Facility / laboratory fee</b> |
| Chest radiograph                          | 33.50                | 77.33                            |
| CT (without contrast)                     | 66.90                | 127.50                           |
| PICC placement                            | 91.70                | 161.50                           |
|                                           |                      |                                  |
| <b>Microbiology</b>                       |                      |                                  |
| Sputum (AFB smear + culture)              |                      | 43.00                            |
| Bronchoscopy                              | 137.35               | 641.67                           |

\* Canadian Dollars, 2008; Excluding dispensing fee for drug costs

† Physician follow-up visit fee ranges according to the frequency of visits per year
